## Myc on my mind: a transcription factor family's essential role in brain development

Lori A. Mainwaring, Bobby Bhatia, and Anna Marie Kenney

Department of Cancer Biology and Genetics, Memorial Sloan-Kettering Cancer Center, New York, NY 10021 USA

Correspondence to: Dr. Anna Kenney, e-mail: kenneya@mskcc.org

Commentary on: Wey and Knoepfler. *c-myc* and *N-myc* promote active stem cell metabolism and cycling as architects of the developing brain. *Oncotarget* 2010; 1: this issue

Submitted: June 7, 2010,

Accepted: June 10, 2010,

Published: June 13, 2010

Copyright: © 2010 Mainwaring et al. This is an open-access article distributed under the terms of the Creative Commons Attribution License, which permits unrestricted use, distribution, and reproduction in any medium, provided the original author and source are credited.

Researchers have been captivated by the *myc* family of proto-oncogenes and their ability to regulate a diverse array of cellular processes through transcriptional regulation of target genes. Since the early 1980s researchers have worked to understand how *Myc* family members regulate hundreds of genes in a context-dependent and cell type-specific manner. Gene expression profiling performed in various over-expression platforms have identified hundreds of genes regulated by *Myc* but have done little to narrow the focus of *Myc*'s function as the genes typically fall into multiple biological categories, including protein biosynthesis, metabolism, cell cycle regulation and microRNAs [1, 2]. In order to parse the cell type-specific function of *Myc* proteins, future studies will benefit from the generation of mouse models wherein gene manipulation can be restricted to specific cell types.

Mammals possess three closely related *myc* family members: *c-*, *N-*, and *L-myc*, which have developmentally regulated, tissue specific expression patterns. These proteins, basic-helix-loop-helix zipper (bHLHZ) transcription factors, heterodimerize with the ubiquitously-expressed Max protein to activate gene expression. In complex with another protein, Miz1, *myc* may suppress gene expression [3, 4]. *Myc* has been

predicted with gene promoters, including those that control cell cycle regulation, apoptosis, differentiation programs as well as chromatin remodeling [1, 5]. More recently *Myc* proteins have also been shown to regulate genes involved in ribosome biosynthesis and other components involved in protein translation [6], suggesting that *Myc*'s roles in cellular processes extend beyond cell cycle and apoptosis regulation. Furthermore, *Myc*'s ability to cooperate with three other transcription factors (Oct4, Sox2 and Klf4) to reprogram somatic cells to induced pluripotent stem cells suggests *Myc* proteins have critical roles in maintaining cells in an undifferentiated state [7, 8].

The role for *Myc* proteins in proliferation has been well documented in mammals through embryonic and

### Fig. *Myc* controls multiple signaling pathways

*Myc* proteins increase euchromatin levels, which is associated with gene transcription and the induction of metabolism, ribosome biogenesis, and protein synthesis, resulting in cellular proliferation, growth, survival, and stem cell self-renewal. Loss or suppression of *Myc* changes heterochromatin levels, which leads to the suppression of transcription and ribosome biogenesis and protein synthesis, resulting in cell-cycle arrest, differentiation, and cell adhesion.

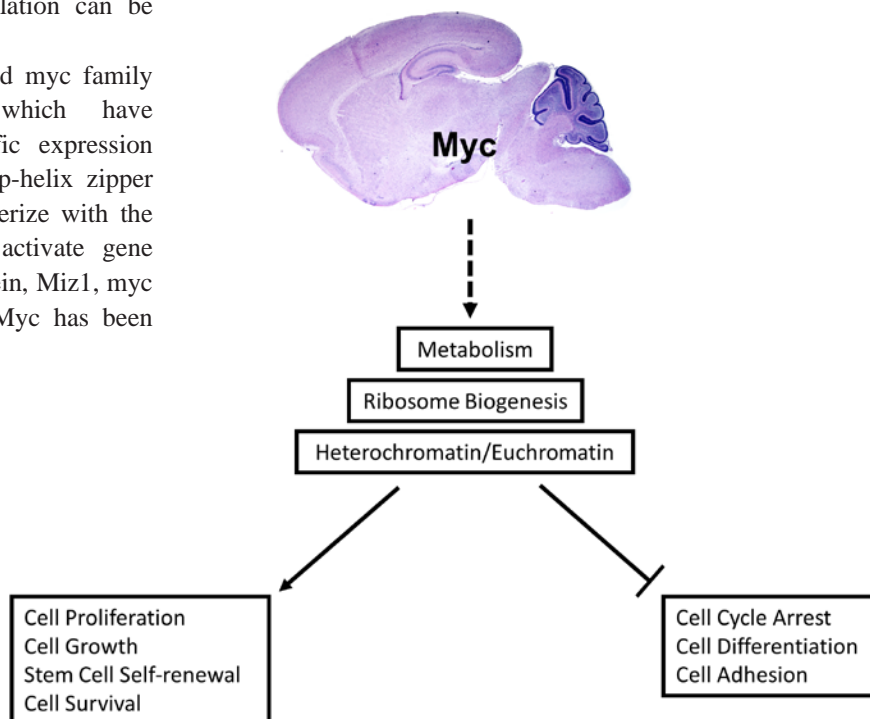

conditional knockout mouse models. *c-myc* is expressed widely in the mouse embryo and expression patterns correlate to rapidly proliferating cells [9]. Accordingly, constitutive *c-myc* knockout mice do not survive past embryonic day (E) 10.5 due to an overall reduced size, enlarged hearts, and a failure in neural tube closure [10]. *N-myc* expression on the other hand, is restricted primarily to epithelial tissues especially those of the developing nervous system. Homozygous *N-myc* mutant embryos die around E11.5 as a result of defects in the central and peripheral nervous system as well as poorly developed lung and gut tissue [11]. Because of embryonic lethality of *c-* and *N-myc* null mice, tissue specific deletions of *Myc* genes have been generated and proved to be usefully in demonstrating the importance of these genes in proliferation, which is illustrated by *c-myc* loss in hematopoietic cells [12, 13].

The role of *N-myc* in neural progenitor cells has been characterized by targeted deletion of the gene in *Nestin*-expressing cells. In addition to overall brain growth defects, the authors observed profound disruptions in cerebellar development as a consequence of reduced numbers of neural progenitors cells and decreased proliferation rates in cerebellar precursor cells [14]. Interestingly knockout of *c-myc* in neural progenitors resulted in only moderate growth defects [14, 15]. Taken together these single *myc* gene conditional knockout models suggest that *c-myc* and *N-myc* have compensatory roles but also have individual functions that are important in the developing nervous system.

In order to dissect out how *c-myc* and *N-myc* cooperate to promote neural development, Wey and Knoepfler deleted both genes in *Nestin*-expressing neural precursor cells. The double knock-out (DKO) mice had a more severe phenotype compared to the single *Myc* gene conditional knockouts and the growth defects were predominately observed in the forebrain/neocortex and hindbrain. The growth defects were determined to be a result of decreased mitotically active cells as well as a failure of progenitor cells in the subventricular and ventricular zone to initiate differentiation programs. Surprisingly, gene expression profiling from the DKO mouse brains revealed modest levels of changes in gene expression compared to controls; however, specific patterns of changes were observed based on ontological analysis of the genes that were significantly altered. A cluster of mitosis-related genes was significantly down-regulated in the DKO mice further indicating a critical role for *myc* genes in neural progenitor proliferation. Consistent with previous studies, genes involved in cellular metabolism and ribosome biogenesis were also

affected in DKO mice [16, 17]. The characterization and analysis of the DKO mice confirm the importance of *Myc* activity in neural precursor proliferation and identify potential *Myc* targets that may function to regulate multiple cellular processes. However, further studies will be required to validate the candidate regulated genes as bona fide *myc* targets, as well as additional mechanistic analysis to verify the roles of *myc* in the biological processes proposed to comprise the *myc* transcriptional program during brain development.

The report by Wey and Knoepfler sheds light into the role of *myc* genes in the developing nervous system but also reveals a useful, important genetic tool for studying *myc* gene targets in the context of specific brain regions or cellular processes. The mice harboring conditionally ablatable *c-* and/or *N-myc* will be amenable to *in vitro* studies of primary neural precursors, neural stem cells, and brain slice explants which can then be exposed to Cre recombinase-carrying vectors, for example, to provide insight into the mechanisms by which *myc* regulates neural progenitor proliferation and differentiation. Furthermore the DKO mice will be useful in conjunction with the single *myc* gene conditional KO mice to look at differences in gene expression profiles and for identification of gene sets critical for proliferation, cell growth, or differentiation in the context of tumors arising from neural stem/progenitor cell populations.

## REFERENCES

1. Patel JH, Loboda AP, Showe MK, Showe LC, McMahon SB: Analysis of genomic targets reveals complex functions of *myc*. *Nat Rev Cancer* 2004;4:562-568.
2. Dang CV: *C-myc* target genes involved in cell growth, apoptosis, and metabolism. *Mol Cell Biol* 1999;19:1-11.
3. Seoane J, Pouppnot C, Staller P, Schader M, Eilers M, Massague J: *Tgfbeta* influences *myc*, *miz-1* and *smad* to control the *cdk* inhibitor *p15ink4b*. *Nat Cell Biol* 2001;3:400-408.
4. Gebhardt A, Frye M, Herold S, Benitah SA, Braun K, Samans B, Watt FM, Elsassner HP, Eilers M: *Myc* regulates keratinocyte adhesion and differentiation via complex formation with *miz1*. *J Cell Biol* 2006;172:139-149.
5. Dang CV, O'Donnell KA, Zeller KI, Nguyen T, Osthus RC, Li F: The *c-myc* target gene network. *Semin Cancer Biol* 2006;16:253-264.
6. van Riggelen J, Yetil A, Felsher DW: *Myc* as a regulator of ribosome biogenesis and protein synthesis. *Nat Rev Cancer* 2010;10:301-309.
7. Nakagawa M, Koyanagi M, Tanabe K, Takahashi K, Ichisaka T, Aoi T, Okita K, Mochiduki Y, Takizawa N, Yamanaka S: Generation of induced pluripotent stem cells

- without myc from mouse and human fibroblasts. *Nat Biotechnol* 2008;26:101-106.
8. Takahashi K, Yamanaka S: Induction of pluripotent stem cells from mouse embryonic and adult fibroblast cultures by defined factors. *Cell* 2006;126:663-676.
  9. Downs KM, Martin GR, Bishop JM: Contrasting patterns of myc and n-myc expression during gastrulation of the mouse embryo. *Genes Dev* 1989;3:860-869.
  10. Davis AC, Wims M, Spotts GD, Hann SR, Bradley A: A null c-myc mutation causes lethality before 10.5 days of gestation in homozygotes and reduced fertility in heterozygous female mice. *Genes Dev* 1993;7:671-682.
  11. Stanton BR, Perkins AS, Tessarollo L, Sassoon DA, Parada LF: Loss of n-myc function results in embryonic lethality and failure of the epithelial component of the embryo to develop. *Genes Dev* 1992;6:2235-2247.
  12. Wilson A, Murphy MJ, Oskarsson T, Kaloulis K, Bettess MD, Oser GM, Pasche AC, Knabenhans C, Macdonald HR, Trumpp A: C-myc controls the balance between hematopoietic stem cell self-renewal and differentiation. *Genes Dev* 2004;18:2747-2763.
  13. Laurenti E, Varnum-Finney B, Wilson A, Ferrero I, Blanco-Bose WE, Ehninger A, Knoepfler PS, Cheng PF, MacDonald HR, Eisenman RN, Bernstein ID, Trumpp A: Hematopoietic stem cell function and survival depend on c-myc and n-myc activity. *Cell Stem Cell* 2008;3:611-624.
  14. Knoepfler PS, Cheng PF, Eisenman RN: N-myc is essential during neurogenesis for the rapid expansion of progenitor cell populations and the inhibition of neuronal differentiation. *Genes Dev* 2002;16:2699-2712.
  15. Hatton BA, Knoepfler PS, Kenney AM, Rowitch DH, de Alboran IM, Olson JM, Eisenman RN: N-myc is an essential downstream effector of shh signaling during both normal and neoplastic cerebellar growth. *Cancer Res* 2006;66:8655-8661.
  16. Schuhmacher M, Staeger MS, Pajic A, Polack A, Weidle UH, Bornkamm GW, Eick D, Kohlhuber F: Control of cell growth by c-myc in the absence of cell division. *Curr Biol* 1999;9:1255-1258.
  17. Shim H, Dolde C, Lewis BC, Wu CS, Dang G, Jungmann RA, Dalla-Favera R, Dang CV: C-myc transactivation of *ldh-a*: Implications for tumor metabolism and growth. *Proc Natl Acad Sci U S A* 1997;94:6658-6663.
